# Supplementary material for: Nurses’ Use of Personal Smartphone Technology in the Workplace: Scoping Review
Source: PubMed Central journal article supplement (PMC7728531; doi:10.2196/18774), 2020-11-26
Supplement: mhealth_v8i11e18774_app1.pdf [file mhealth_v8i11e18774_app1.pdf]

## **Supplementary Material 1: Search Terms**

Search terms:

Nurse terms: (nurse OR nursing OR nurses)

Personal digital technology terms: (personal digital technology OR smartphone OR mobile phone OR cellular phone OR cell phone).

Limits:

English only  
2010-present
